# Supplementary material
Source: PubMed Central journal article supplement (PMC4349075)
Supplement: 8d450e2c1a710482f24a7feb5511e8a3_genetics.114.173948-4.pdf [file 8d450e2c1a710482f24a7feb5511e8a3_genetics.114.173948-4.pdf]

**Table S3 Negative binomial generalized linear model for number of offspring produced in the “first” (most successful) by each genotype**

| Factor          | df  | Sum Sq. | Mean Sq. | F value | P       |
|-----------------|-----|---------|----------|---------|---------|
| X chromosome    | 1   | 23123   | 23123    | 92.51   | <0.0001 |
| Y chromosome    | 2   | 6512    | 3256     | 13.03   | <0.0001 |
| X-Y interaction | 2   | 8861    | 4430     | 17.73   | <0.0001 |
| Block           | 1   | 8863    | 8863     | 35.46   | <0.0001 |
| Residuals       | 109 | 27244   | 250      |         |         |
