# Supplementary material
Source: PubMed Central journal article supplement (PMC4349075)
Supplement: 8d02238615a85b5d3c886f3b43247d3c_genetics.114.173948-2.pdf [file 8d02238615a85b5d3c886f3b43247d3c_genetics.114.173948-2.pdf]

**Table S4 Negative binomial generalized linear model for total offspring produced by each genotype**

| Factor          | df  | Sum Sq. | Mean Sq. | F value | P       |
|-----------------|-----|---------|----------|---------|---------|
| X chromosome    | 1   | 340587  | 340587   | 114.954 | <0.0001 |
| Y chromosome    | 2   | 65817   | 32908    | 11.107  | <0.0001 |
| X-Y interaction | 2   | 53297   | 26648    | 8.994   | <0.0001 |
| Block           | 1   | 88712   | 88712    | 29.942  | <0.0001 |
| Residuals       | 109 | 322948  | 2963     |         |         |
