# Supplementary material
Source: PubMed Central journal article supplement (PMC4349075)
Supplement: 444a85770c4c6f704fc0db54e818b920_genetics.114.173948-7.pdf [file 444a85770c4c6f704fc0db54e818b920_genetics.114.173948-7.pdf]

**Table S5** Distance matrix between strain 141.02 ( $X^{ST}$ ), two sex-ratio strains ( $X^{SR1}$  and  $X^{SR2}$ ) and *D. pseudoobscura* for a 286bp region of *Runt* including 249 bases of intronic sequence and the first 37 bases of exon 2. Above diagonal represents percent identity, below diagonal represents number of differences.

---

|                                       | <i>D. pseudoobscura</i> | <i>D. affinis</i> 141.02 ( $X^{ST}$ ) | <i>D. affinis</i> $X^{SR1}$ | <i>D. affinis</i> $X^{SR2}$ |
|---------------------------------------|-------------------------|---------------------------------------|-----------------------------|-----------------------------|
| <i>D. pseudoobscura</i>               | -                       | 76.81                                 | 77.17                       | 77.17                       |
| <i>D. affinis</i> 141.02 ( $X^{ST}$ ) | 64                      | -                                     | 97.86                       | 99.64                       |
| <i>D. affinis</i> $X^{SR1}$           | 63                      | 5                                     | -                           | 98.22                       |
| <i>D. affinis</i> $X^{SR2}$           | 63                      | 1                                     | 6                           | -                           |

---
