# Supplementary material
Source: PubMed Central journal article supplement (PMC4349075)
Supplement: 03153fad959d9e6bccf29aa55c854fc5_genetics.114.173948-6.pdf [file 03153fad959d9e6bccf29aa55c854fc5_genetics.114.173948-6.pdf]

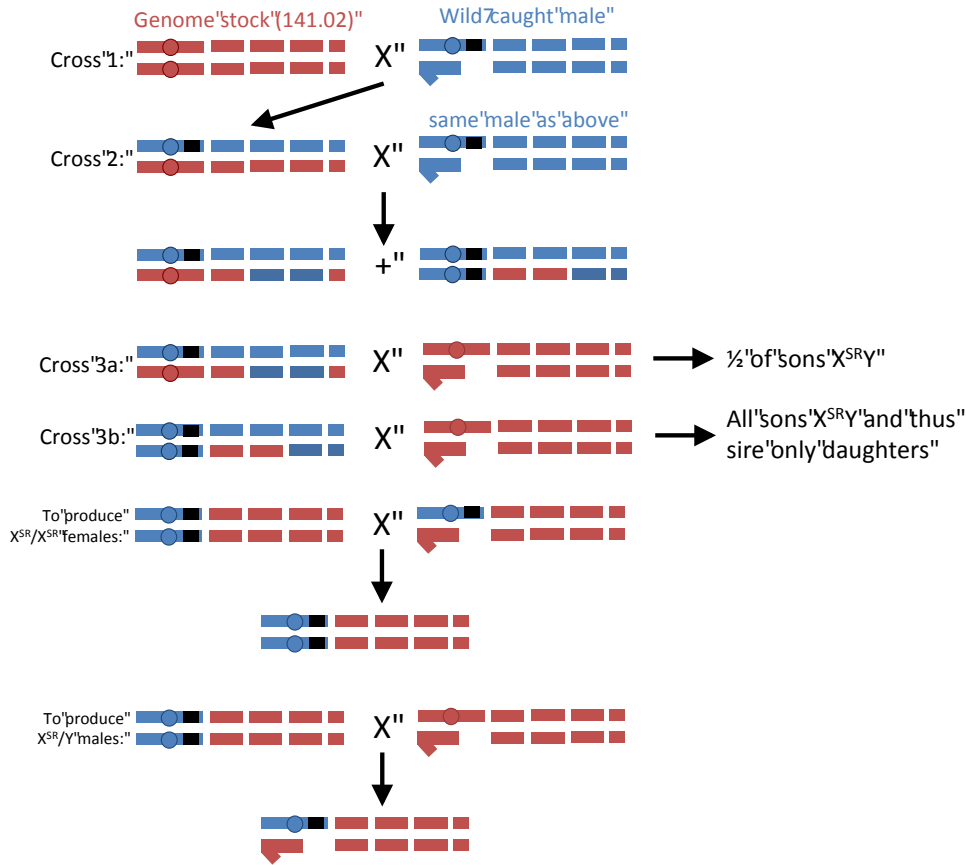

**Figure S1** Crossing scheme to generate  $X^{SR}$  replacement lines. Cross 1: Wild-caught males crossed to lab stock (141.02) and sex-ratio of offspring noted. All lines with skewed sex-ratio were retained. Cross 2: Same wild-caught male as in Cross 1 mated to his daughters. Most offspring from Cross 2 were be female and assuming equal viability, 50% were homozygous for  $X^{SR}$  and 50% were heterozygous ( $X^{SR}/X^{ST}$ ). Cross 3: Virgin females from Cross 2 were mated to standard males (141.02). If these Cross 3 females were heterozygous for the driver, half of sons sired female-biased sex-ratios (3a). If they were heterozygous, all sons sired female-biased sex-ratios (3b). Males from Cross 3b were mated to virgin females from Cross 2 (their aunts) assuring that the male was  $X^{SR}Y$  and the female was  $X^{SR}X^{SR}$ . To generate new  $X^{SR}X^{SR}$  females, virgin  $X^{SR}X^{SR}$  females were mated to  $X^{SR}Y$  males. To generate new  $X^{SR}Y$  males, virgin  $X^{SR}X^{SR}$  females were mated to  $X^{ST}Y$  males (141.02). This crossing scheme replaces 50% of the genome each generation with 141.02 genetic material and therefore over several generations, the wild autosomes and Y chromosome are replaced with the lab stock (141.02).
