# Supplementary material
Source: PubMed Central journal article supplement (PMC4349075)
Supplement: 9901f34f076ee44c08faca1200b52f91_genetics.114.173948-9.pdf [file 9901f34f076ee44c08faca1200b52f91_genetics.114.173948-9.pdf]

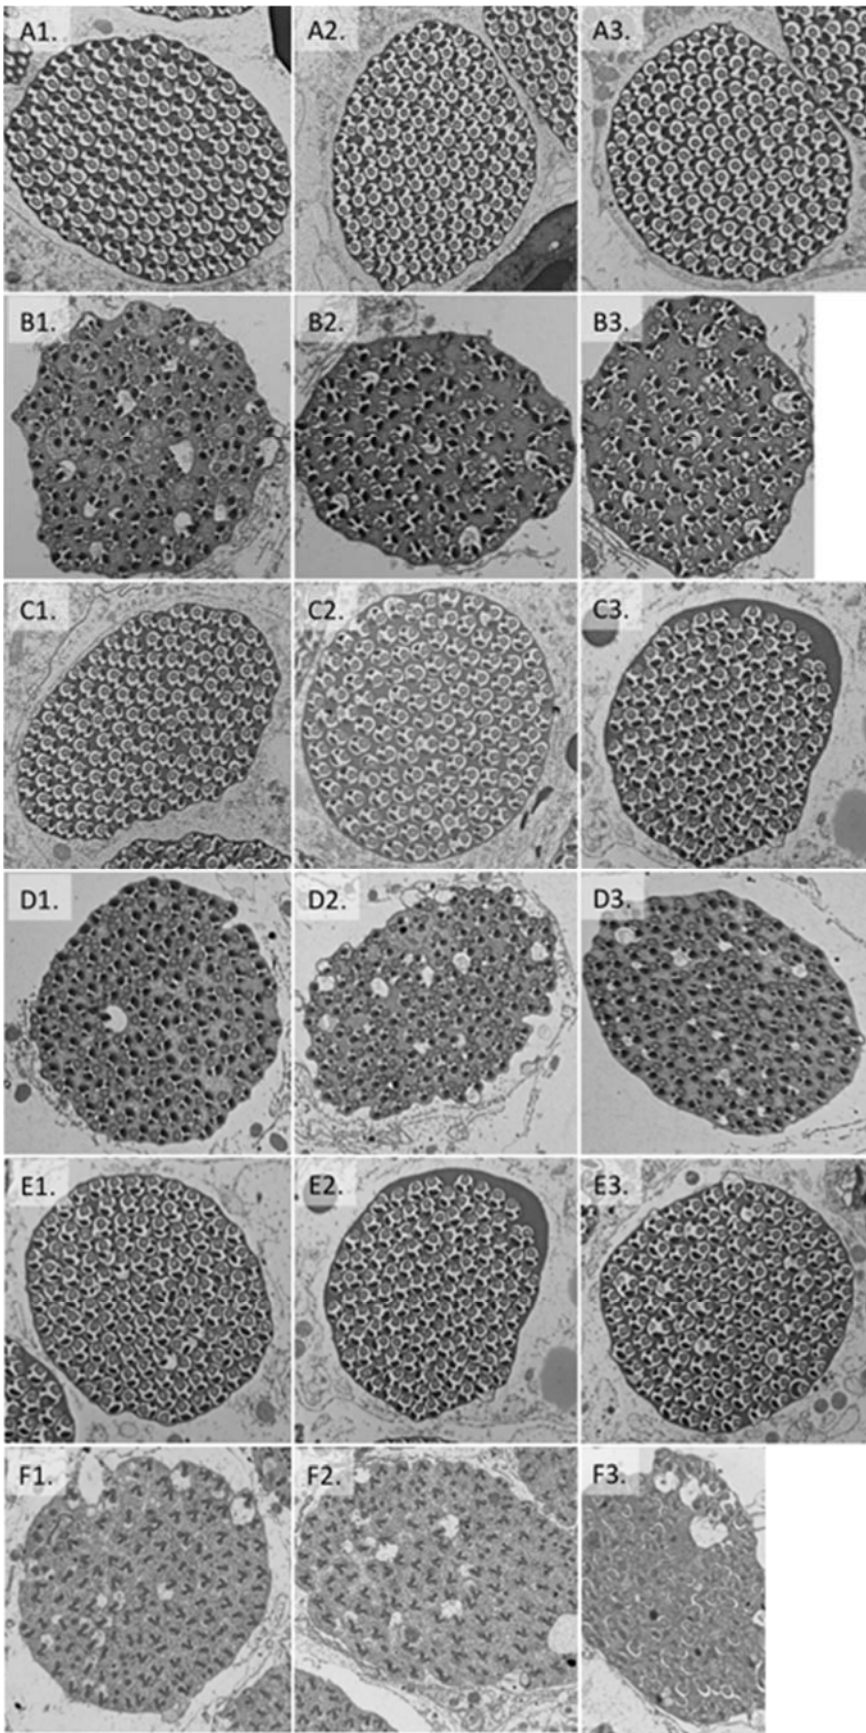

**Figure S3** Variation in sperm bundle morphology for each genotype, see corresponding Figure 4 in main text. A1-A3)

$X^{STy^{sus}}$ , B1-B3)  $X^{SRy^{sus}}$ , C1-C3)  $X^{STy^{res}}$ , D1-D3)  $X^{SRy^{res}}$ , E1-E3)  $X^{STO}$  and F1-F3)  $X^{SRO}$ .
