# Supplementary material
Source: PubMed Central journal article supplement (PMC4349075)
Supplement: ba81a237829b3072aaccf3b7fea2104a_genetics.114.173948-8.pdf [file ba81a237829b3072aaccf3b7fea2104a_genetics.114.173948-8.pdf]

**Table S1 FDR adjusted P-values for Tukey post-hoc comparisons of sex-ratios sired by males with X<sup>SR</sup> and several different Y chromosomes**

|     | 114 | 145 | 189 | 123 | 41 | 166 | 33 | 52 | 96 | 168 | 138 | 171 | 173 | 79 | 162 | 107 | 177 | 159 | 62  |
|-----|-----|-----|-----|-----|----|-----|----|----|----|-----|-----|-----|-----|----|-----|-----|-----|-----|-----|
| 114 |     |     |     |     |    |     |    |    |    |     |     |     |     |    | *   | *   |     | *** | *** |
| 145 |     |     |     |     |    |     |    |    |    |     |     |     |     |    |     |     |     | *** | *** |
| 189 |     |     |     |     |    |     |    |    |    |     |     |     |     |    |     |     |     | *** | *** |
| 123 |     |     |     |     |    |     |    |    |    |     |     |     |     |    |     |     |     | *** | *** |
| 41  |     |     |     |     |    |     |    |    |    |     |     |     |     |    |     |     |     | *** | *** |
| 166 |     |     |     |     |    |     |    |    |    |     |     |     | *   |    | *   | *   |     | *** | *** |
| 33  |     |     |     |     |    |     |    |    |    |     |     |     |     |    |     |     |     | *** | *** |
| 52  |     |     |     |     |    |     |    |    |    |     |     |     |     |    |     |     | *   | *** | *** |
| 96  |     |     |     |     |    |     |    |    |    |     |     |     |     |    |     |     |     | *** | *** |
| 168 |     |     |     |     |    |     |    |    |    |     |     |     |     |    |     |     |     | *** | *** |
| 138 |     |     |     |     |    |     |    |    |    |     |     |     |     |    |     |     |     | *** | *** |
| 171 |     |     |     |     |    |     |    |    |    |     |     |     |     |    |     |     |     | *** | *** |
| 173 |     |     |     |     |    |     |    |    |    |     |     |     |     |    |     |     |     | *** | *** |
| 79  |     |     |     |     |    |     |    |    |    |     |     |     |     |    |     |     |     | *** | *** |
| 162 |     |     |     |     |    |     |    |    |    |     |     |     |     |    |     |     |     | *** | *** |
| 107 |     |     |     |     |    |     |    |    |    |     |     |     |     |    |     |     |     | *** | *** |
| 177 |     |     |     |     |    |     |    |    |    |     |     |     |     |    |     |     |     | *** | *** |
| 159 |     |     |     |     |    |     |    |    |    |     |     |     |     |    |     |     |     |     | *   |
| 62  |     |     |     |     |    |     |    |    |    |     |     |     |     |    |     |     |     |     |     |
