# Supplementary material
Source: PubMed Central journal article supplement (PMC4349075)
Supplement: c02c3e9f663c017bd9030cd1968c3444_genetics.114.173948-1.pdf [file c02c3e9f663c017bd9030cd1968c3444_genetics.114.173948-1.pdf]

**Table S1 FDR adjusted P-values for Tukey post-hoc comparisons of sex-ratios sired by males with X<sup>SR</sup> and several different Y chromosomes**

|     | 114 | 145 | 189 | 123 | 41 | 166 | 33 | 52 | 96 | 168 | 138 | 171 | 173 | 79 | 162 | 107 | 177 | 159 | 62  |
|-----|-----|-----|-----|-----|----|-----|----|----|----|-----|-----|-----|-----|----|-----|-----|-----|-----|-----|
| 114 |     |     |     |     |    |     |    |    |    |     |     |     |     |    | *   | *   |     | *** | *** |
| 145 |     |     |     |     |    |     |    |    |    |     |     |     |     |    |     |     |     | *** | *** |
| 189 |     |     |     |     |    |     |    |    |    |     |     |     |     |    |     |     |     | *** | *** |
| 123 |     |     |     |     |    |     |    |    |    |     |     |     |     |    |     |     |     | *** | *** |
| 41  |     |     |     |     |    |     |    |    |    |     |     |     |     |    |     |     |     | *** | *** |
| 166 |     |     |     |     |    |     |    |    |    |     |     |     | *   |    | *   | *   |     | *** | *** |
| 33  |     |     |     |     |    |     |    |    |    |     |     |     |     |    |     |     |     | *** | *** |
| 52  |     |     |     |     |    |     |    |    |    |     |     |     |     |    |     |     | *   | *** | *** |
| 96  |     |     |     |     |    |     |    |    |    |     |     |     |     |    |     |     |     | *** | *** |
| 168 |     |     |     |     |    |     |    |    |    |     |     |     |     |    |     |     |     | *** | *** |
| 138 |     |     |     |     |    |     |    |    |    |     |     |     |     |    |     |     |     | *** | *** |
| 171 |     |     |     |     |    |     |    |    |    |     |     |     |     |    |     |     |     | *** | *** |
| 173 |     |     |     |     |    |     |    |    |    |     |     |     |     |    |     |     |     | *** | *** |
| 79  |     |     |     |     |    |     |    |    |    |     |     |     |     |    |     |     |     | *** | *** |
| 162 |     |     |     |     |    |     |    |    |    |     |     |     |     |    |     |     |     | *** | *** |
| 107 |     |     |     |     |    |     |    |    |    |     |     |     |     |    |     |     |     | *** | *** |
| 177 |     |     |     |     |    |     |    |    |    |     |     |     |     |    |     |     |     | *** | *** |
| 159 |     |     |     |     |    |     |    |    |    |     |     |     |     |    |     |     |     |     | *   |
| 62  |     |     |     |     |    |     |    |    |    |     |     |     |     |    |     |     |     |     |     |

**Table S2 Generalized linear model assuming a Poisson distribution for number of successful matings by each genotype**

| Factor          | df  | Sum Sq. | Mean Sq. | F value | P       |
|-----------------|-----|---------|----------|---------|---------|
| X chromosome    | 1   | 236.95  | 236.95   | 166.749 | <0.0001 |
| Y chromosome    | 2   | 100.88  | 50.44    | 35.497  | <0.0001 |
| X-Y interaction | 2   | 68.31   | 34.16    | 24.037  | <0.0001 |
| Block           | 1   | 0.50    | 0.50     | 0.351   | 0.56    |
| Residuals       | 109 | 154.89  | 1.42     |         |         |

**Table S3 Negative binomial generalized linear model for number of offspring produced in the “first” (most successful) by each genotype**

| Factor          | df  | Sum Sq. | Mean Sq. | F value | P       |
|-----------------|-----|---------|----------|---------|---------|
| X chromosome    | 1   | 23123   | 23123    | 92.51   | <0.0001 |
| Y chromosome    | 2   | 6512    | 3256     | 13.03   | <0.0001 |
| X-Y interaction | 2   | 8861    | 4430     | 17.73   | <0.0001 |
| Block           | 1   | 8863    | 8863     | 35.46   | <0.0001 |
| Residuals       | 109 | 27244   | 250      |         |         |

**Table S4 Negative binomial generalized linear model for total offspring produced by each genotype**

| Factor          | df  | Sum Sq. | Mean Sq. | F value | P       |
|-----------------|-----|---------|----------|---------|---------|
| X chromosome    | 1   | 340587  | 340587   | 114.954 | <0.0001 |
| Y chromosome    | 2   | 65817   | 32908    | 11.107  | <0.0001 |
| X-Y interaction | 2   | 53297   | 26648    | 8.994   | <0.0001 |
| Block           | 1   | 88712   | 88712    | 29.942  | <0.0001 |
| Residuals       | 109 | 322948  | 2963     |         |         |

**Table S5** Distance matrix between strain 141.02 ( $X^{ST}$ ), two sex-ratio strains ( $X^{SR1}$  and  $X^{SR2}$ ) and *D. pseudoobscura* for a 286bp region of *Runt* including 249 bases of intronic sequence and the first 37 bases of exon 2. Above diagonal represents percent identity, below diagonal represents number of differences.

---

|                                       | <i>D. pseudoobscura</i> | <i>D. affinis</i> 141.02 ( $X^{ST}$ ) | <i>D. affinis</i> $X^{SR1}$ | <i>D. affinis</i> $X^{SR2}$ |
|---------------------------------------|-------------------------|---------------------------------------|-----------------------------|-----------------------------|
| <i>D. pseudoobscura</i>               | -                       | 76.81                                 | 77.17                       | 77.17                       |
| <i>D. affinis</i> 141.02 ( $X^{ST}$ ) | 64                      | -                                     | 97.86                       | 99.64                       |
| <i>D. affinis</i> $X^{SR1}$           | 63                      | 5                                     | -                           | 98.22                       |
| <i>D. affinis</i> $X^{SR2}$           | 63                      | 1                                     | 6                           | -                           |

---

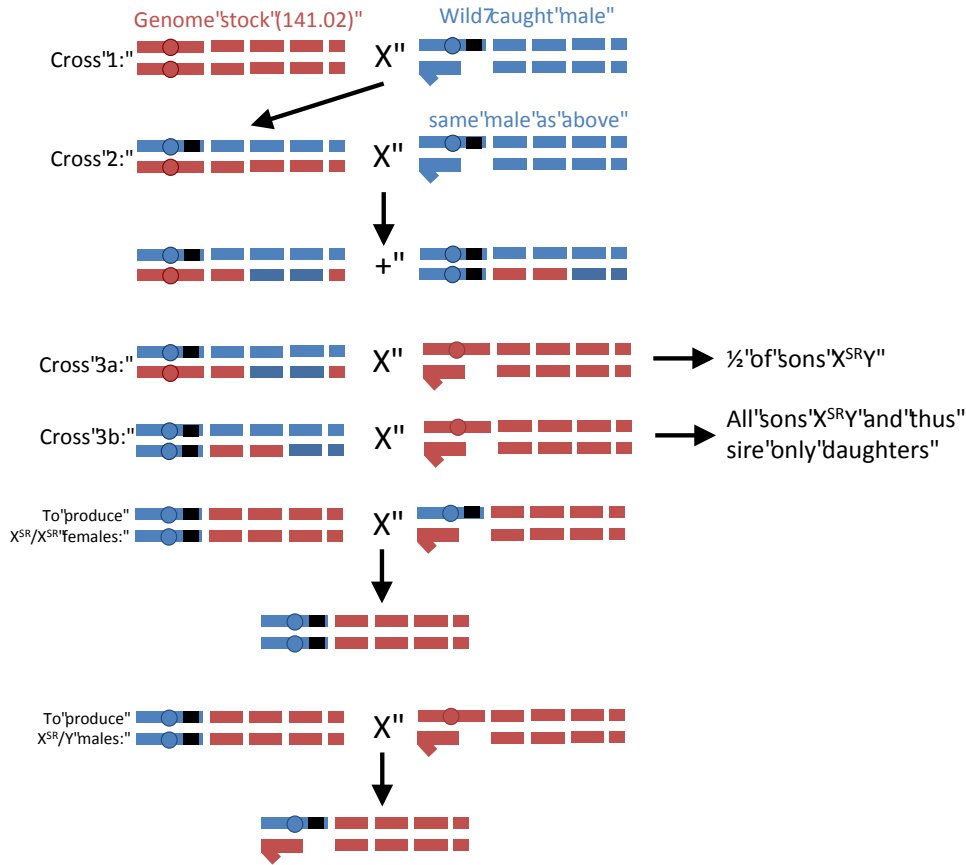

**Figure S1** Crossing scheme to generate  $X^{SR}$  replacement lines. Cross 1: Wild-caught males crossed to lab stock (141.02) and sex-ratio of offspring noted. All lines with skewed sex-ratio were retained. Cross 2: Same wild-caught male as in Cross 1 mated to his daughters. Most offspring from Cross 2 were be female and assuming equal viability, 50% were homozygous for  $X^{SR}$  and 50% were heterozygous ( $X^{SR}/X^{ST}$ ). Cross 3: Virgin females from Cross 2 were mated to standard males (141.02). If these Cross 3 females were heterozygous for the driver, half of sons sired female-biased sex-ratios (3a). If they were heterozygous, all sons sired female-biased sex-ratios (3b). Males from Cross 3b were mated to virgin females from Cross 2 (their aunts) assuring that the male was  $X^{SR}Y$  and the female was  $X^{SR}X^{SR}$ . To generate new  $X^{SR}X^{SR}$  females, virgin  $X^{SR}X^{SR}$  females were mated to  $X^{SR}Y$  males. To generate new  $X^{SR}Y$  males, virgin  $X^{SR}X^{SR}$  females were mated to  $X^{ST}Y$  males (141.02). This crossing scheme replaces 50% of the genome each generation with 141.02 genetic material and therefore over several generations, the wild autosomes and Y chromosome are replaced with the lab stock (141.02).

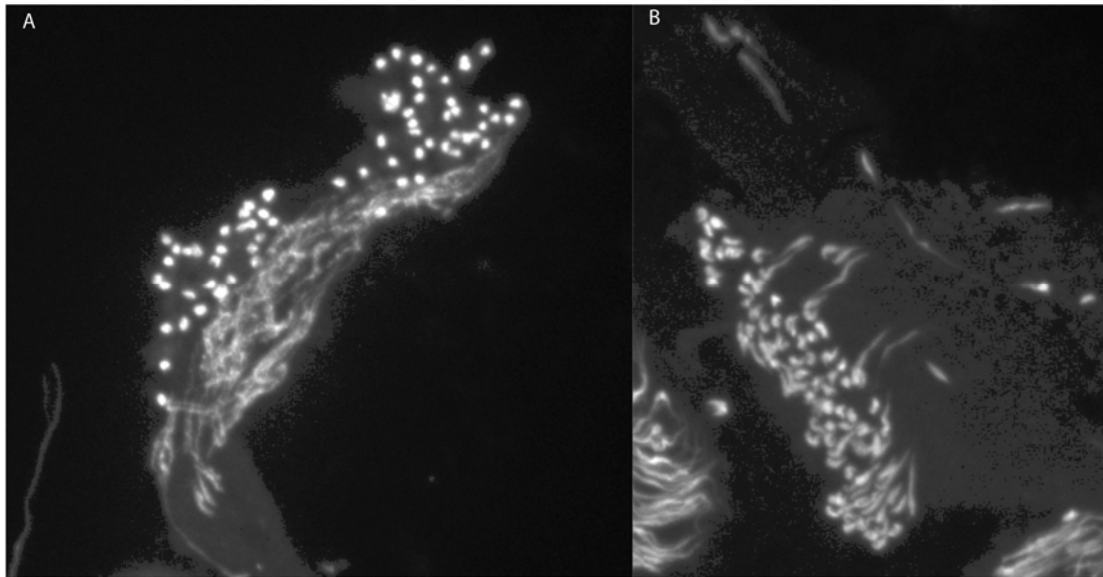

**Figure S2** Phenotypes from  $X^{SRYSUS}$  testes are variable. (A) 64 round-headed spermatozoa in the same cyst as fully elongated spermatozoa. (B) A cyst of elongating spermatozoa where some spermatozoa heads are malformed.

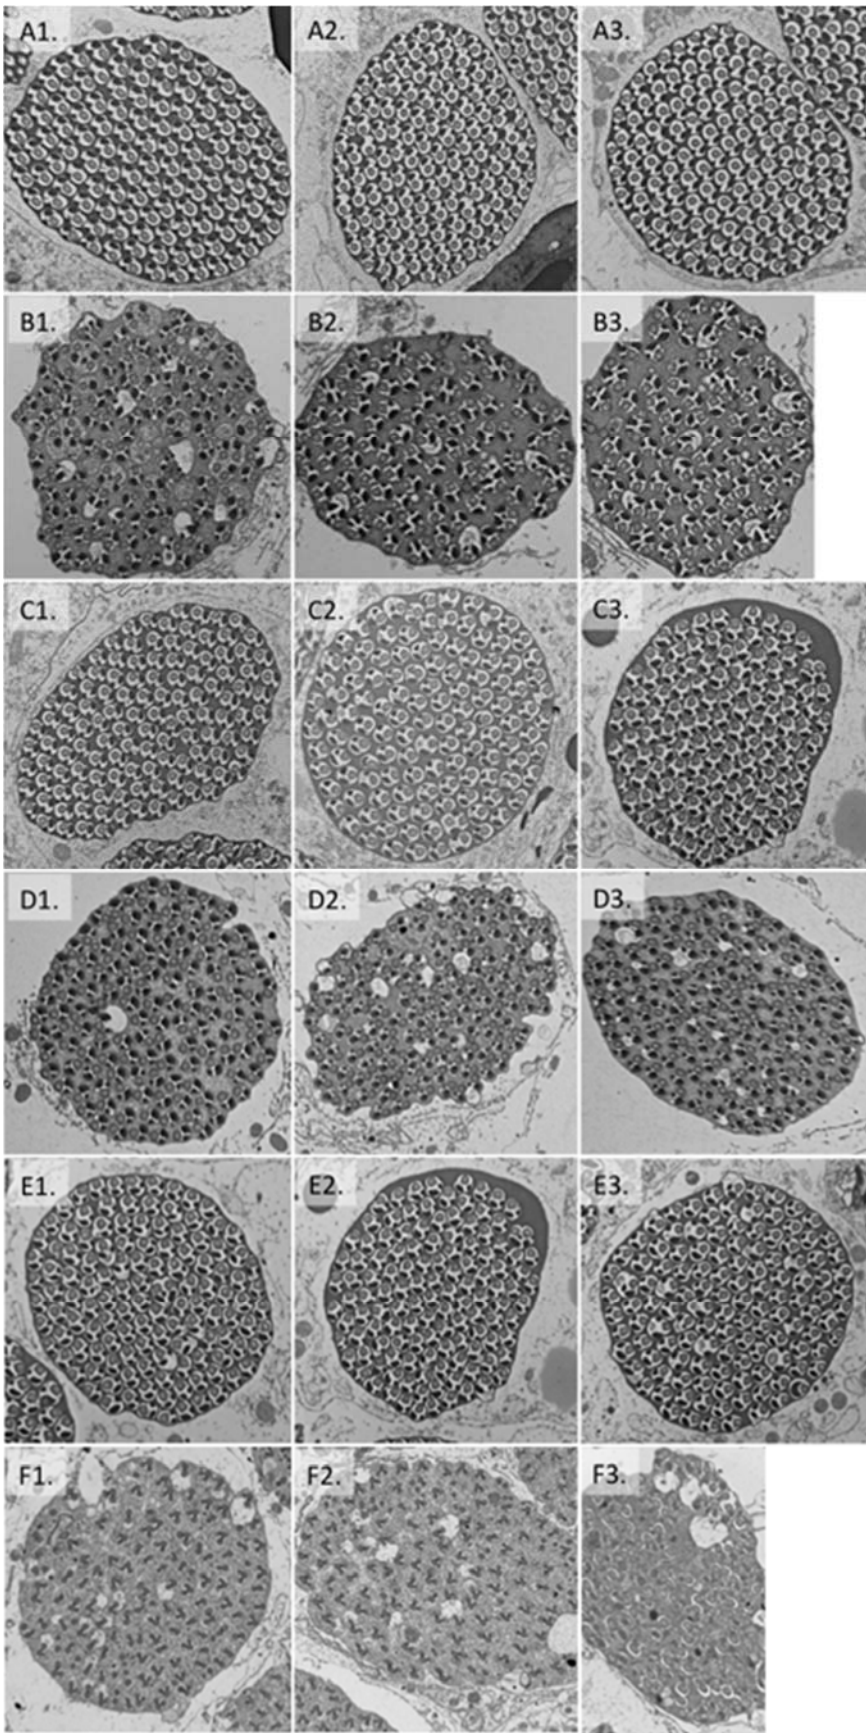

**Figure S3** Variation in sperm bundle morphology for each genotype, see corresponding Figure 4 in main text. A1-A3)

$X^{STYsus}$ , B1-B3)  $X^{SRYSus}$ , C1-C3)  $X^{STYres}$ , D1-D3)  $X^{SRYres}$ , E1-E3)  $X^{STO}$  and F1-F3)  $X^{SRO}$ .
