# Supplementary material
Source: PubMed Central journal article supplement (PMC4349075)
Supplement: d516c7e32986c616779434938ec2f274_genetics.114.173948-3.pdf [file d516c7e32986c616779434938ec2f274_genetics.114.173948-3.pdf]

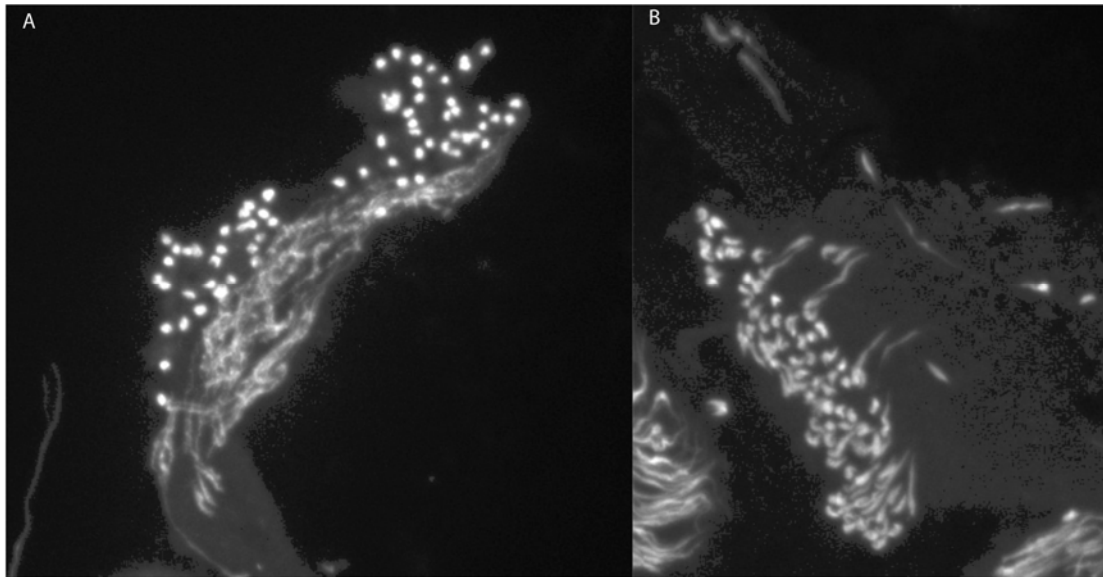

**Figure S2** Phenotypes from  $X^{SRYSUS}$  testes are variable. (A) 64 round-headed spermatozoa in the same cyst as fully elongated spermatozoa. (B) A cyst of elongating spermatozoa where some spermatozoa heads are malformed.
