# Supplementary material
Source: PubMed Central journal article supplement (PMC4349075)
Supplement: eb22a68b14d1c188939cf65ba2a61536_genetics.114.173948-5.pdf [file eb22a68b14d1c188939cf65ba2a61536_genetics.114.173948-5.pdf]

**Table S2 Generalized linear model assuming a Poisson distribution for number of successful matings by each genotype**

| Factor          | df  | Sum Sq. | Mean Sq. | F value | P       |
|-----------------|-----|---------|----------|---------|---------|
| X chromosome    | 1   | 236.95  | 236.95   | 166.749 | <0.0001 |
| Y chromosome    | 2   | 100.88  | 50.44    | 35.497  | <0.0001 |
| X-Y interaction | 2   | 68.31   | 34.16    | 24.037  | <0.0001 |
| Block           | 1   | 0.50    | 0.50     | 0.351   | 0.56    |
| Residuals       | 109 | 154.89  | 1.42     |         |         |
